# Supplementary material for: How to reliably detect molecular clusters and nucleation mode particles withNeutral cluster and Air Ion Spectrometer (NAIS)
Source: Copernicus journal article supplement (doi:10.5194/amt-9-3577-2016), 2016-08-03
Supplement: Supplementary file 1 [file amt-9-3577-2016-supplement.zip]

Archive with 3 entries (3 files):
- S1 Cleaning mobility analysers by opening NAIS.pdf
- amt-9-3577-2016-supplement-title-page.pdf
- S2 NAIS troubleshooting by elimination.pdf
