# Supplementary material for: How to reliably detect molecular clusters and nucleation mode particles withNeutral cluster and Air Ion Spectrometer (NAIS)
Source: Copernicus journal article supplement (doi:10.5194/amt-9-3577-2016), 2016-08-03
Supplement: Supplementary file 1 [file amt-9-3577-2016-supplement.zip › amt-9-3577-2016-supplement-title-page.pdf]

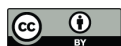

## *Supplement of*

# **How to reliably detect molecular clusters and nucleation mode particles with Neutral cluster and Air Ion Spectrometer (NAIS)**

**Hanna E. Manninen et al.**

*Correspondence to:* Hanna E. Manninen ([hanna.manninen@helsinki.fi](mailto:hanna.manninen@helsinki.fi))

- [amt-9-3577-2016-supplement-title-page.pdf](#)
- [S1 Cleaning mobility analysers by opening NAIS.pdf](#)
- [S2 NAIS troubleshooting by elimination.pdf](#)

The copyright of individual parts of the supplement might differ from the CC-BY 3.0 licence.
